# Supplementary material for: Green preparation of CoMoO4 nanoparticles through a mechanochemical method for energy storage applications
Source: Royal Society of Chemistry journal article supplement (doi:10.1039/d2nj04351c), 2022-01-01
Supplement: d2nj04351c1.pdf [file d2nj04351c1.pdf]

## Supporting Information

for

### Green preparation of CoMoO<sub>4</sub> nanoparticles through a mechanochemical method for energy storage applications

Liangyu Liu<sup>a,b</sup>, Dianfeng Dai<sup>a</sup>, Bin Yang<sup>b\*</sup>, Bing Li<sup>b\*</sup> and Xiaoyang Liu<sup>a\*</sup>

a. State Key Laboratory of Inorganic Synthesis and Preparative Chemistry, College  
of Chemistry, Jilin University, Changchun 130012, China. Tel/Fax: +86-431-  
85168316

b. Center for High Pressure Science and Technology Advanced Research,  
Changchun 130012, China

\* Corresponding authors

Xiaoyang Liu: liuxy@jlu.edu.cn; Bin Yang: yangbin@hpstar.ac.cn; Bing Li:  
libing@hpstar.ac.cn.

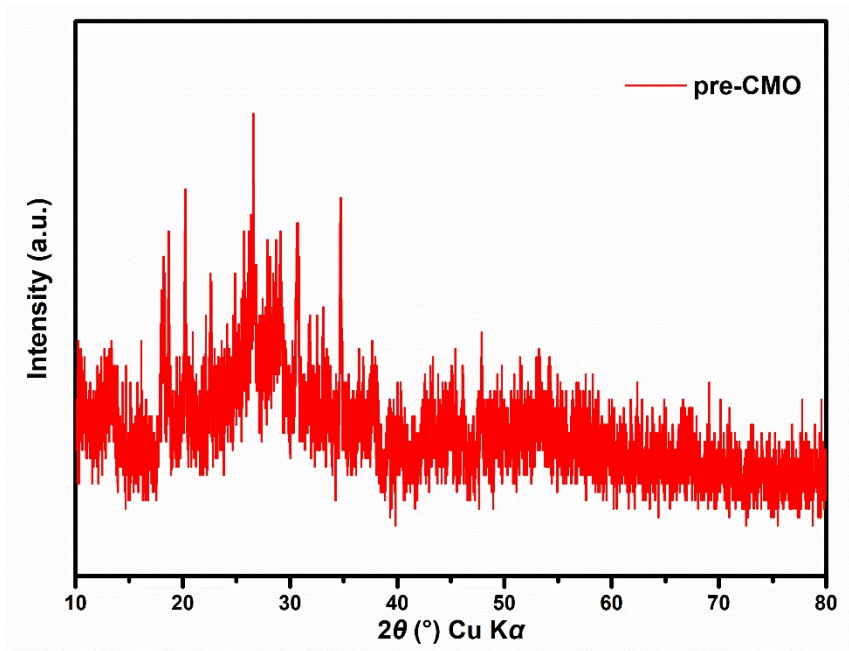

Figure S1. XRD pattern of pre-CMO.

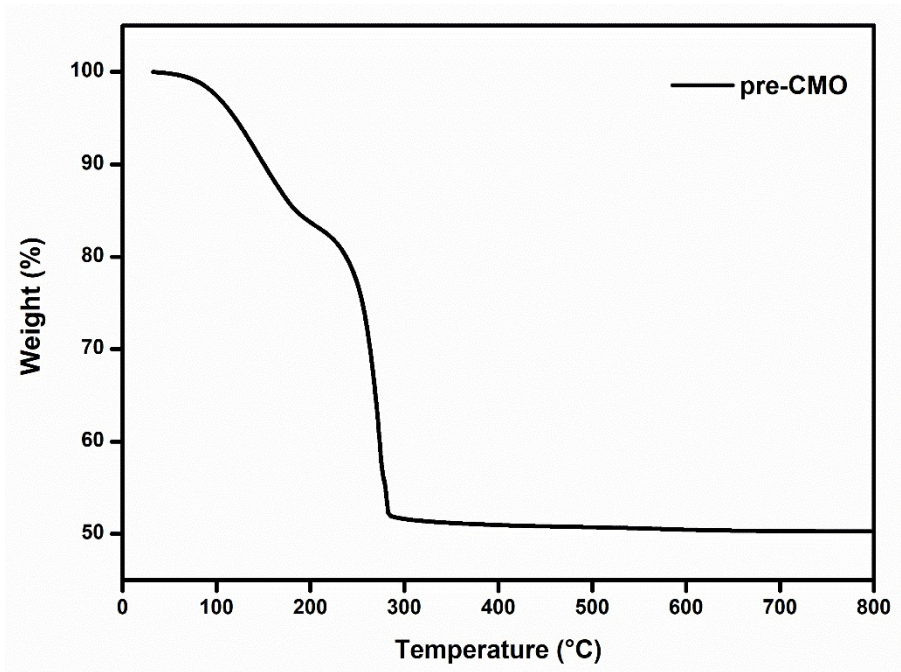

Figure S2. TGA curve of pre-CMO under air atmosphere.

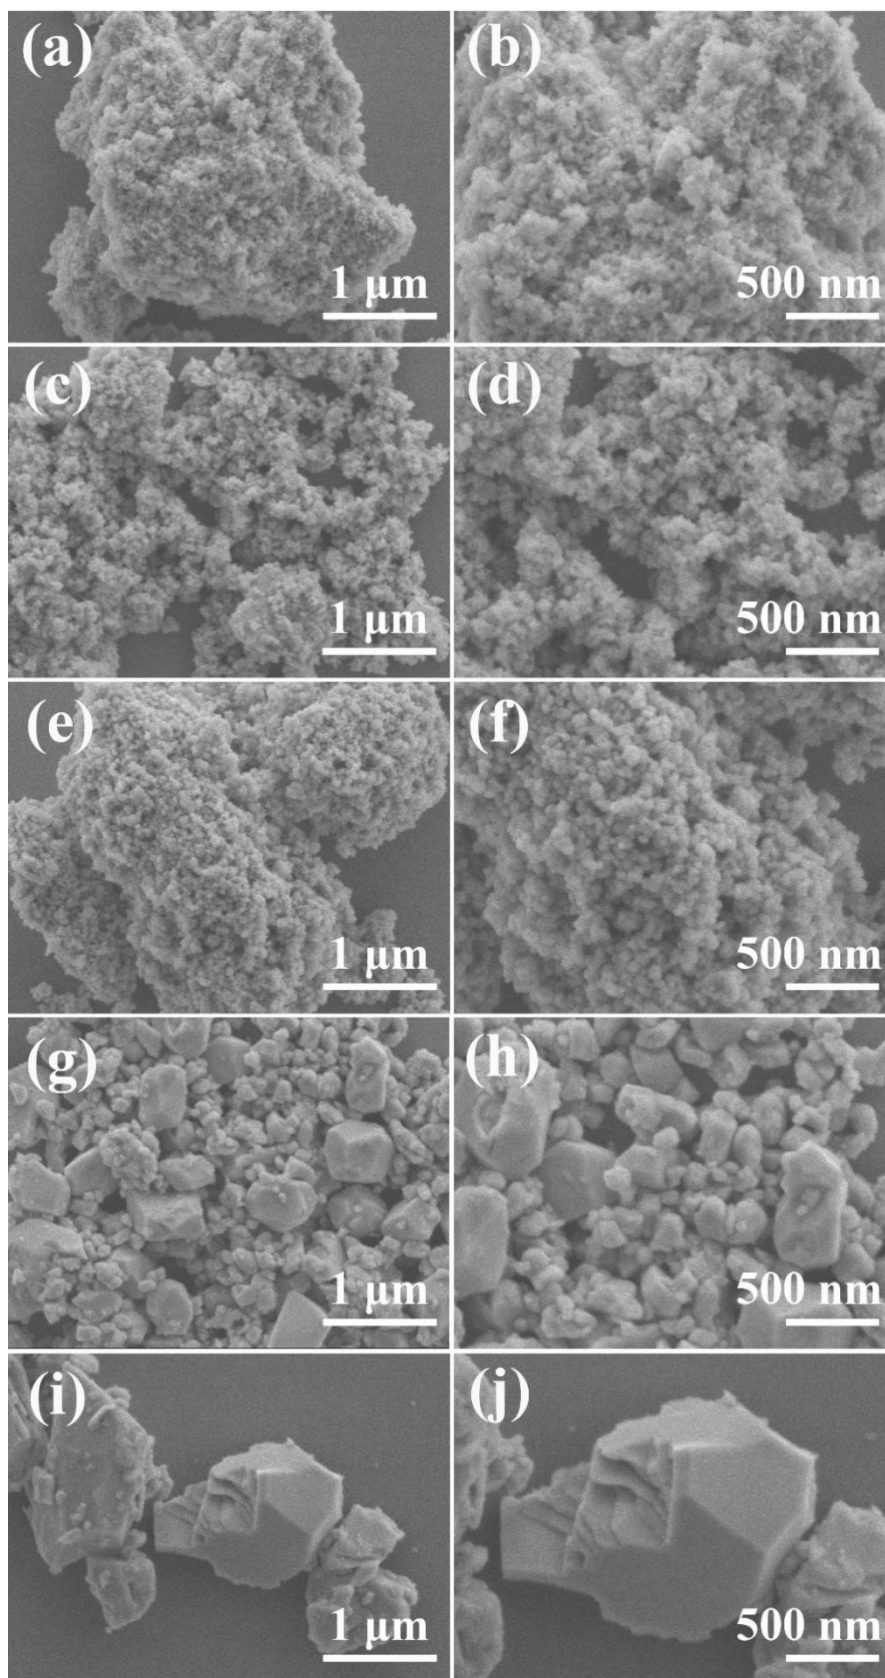

Figure S3. SEM images of (a, b) CMO-300, (c, d) CMO-400, (e, f) CMO-500, (g, h) CMO-600, and (i, j) CMO-700.

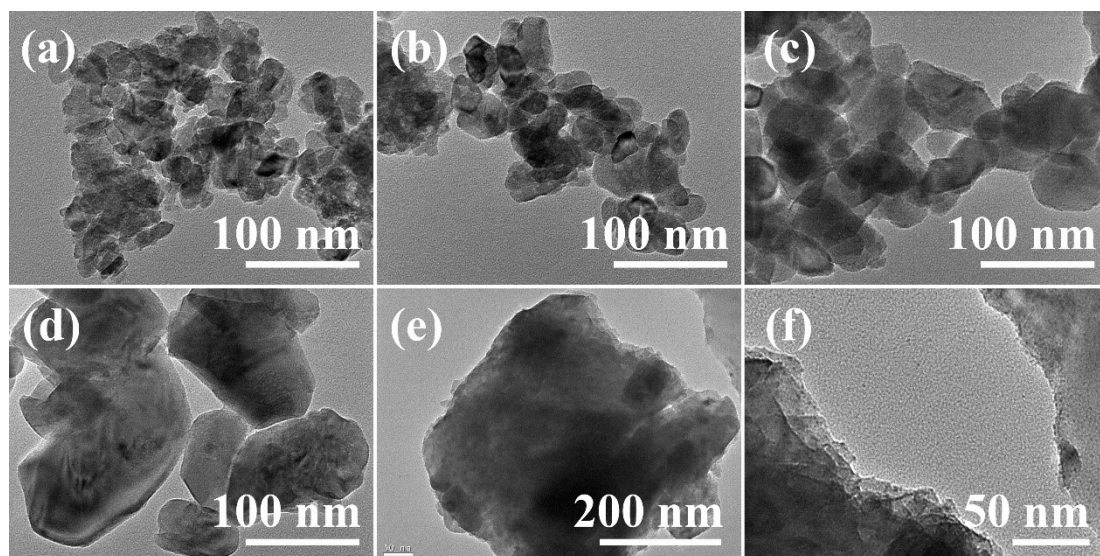

Figure S4. TEM images of (a) CMO-300, (b) CMO-400, (c) CMO-500, (d) CMO-600, and (e, f) CMO-700.

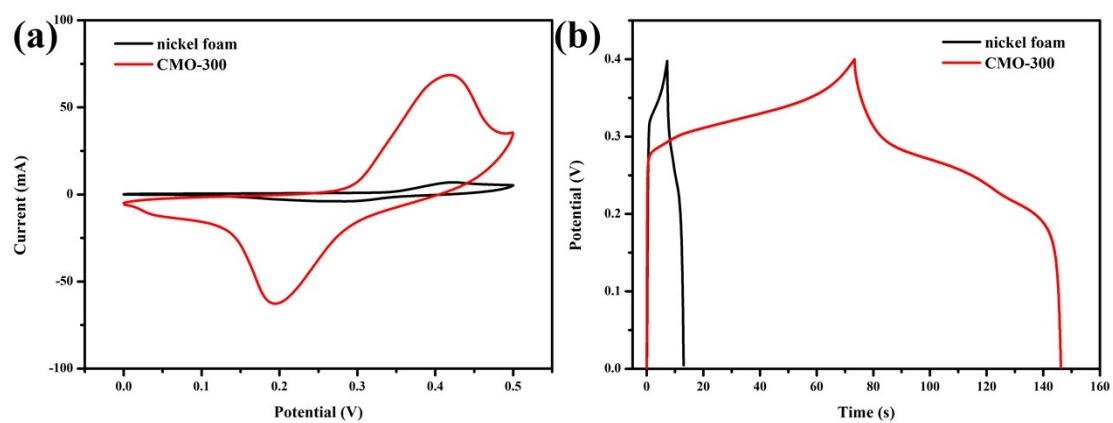

Figure S5. The performance comparison of CMO-300 and nickel foam: (a) CV curves at  $100 \text{ mV s}^{-1}$  and (b) GCD curves at a current density of  $2 \text{ mA cm}^{-2}$ .

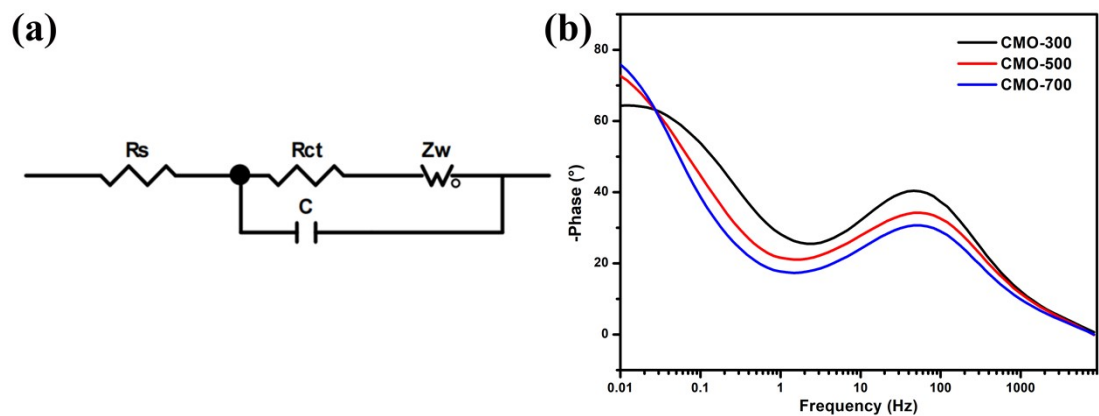

Figure S6. (a) The equivalent circuit and (b) the Bode phase angle plots for CMO-300, CMO-500, and CMO-700.

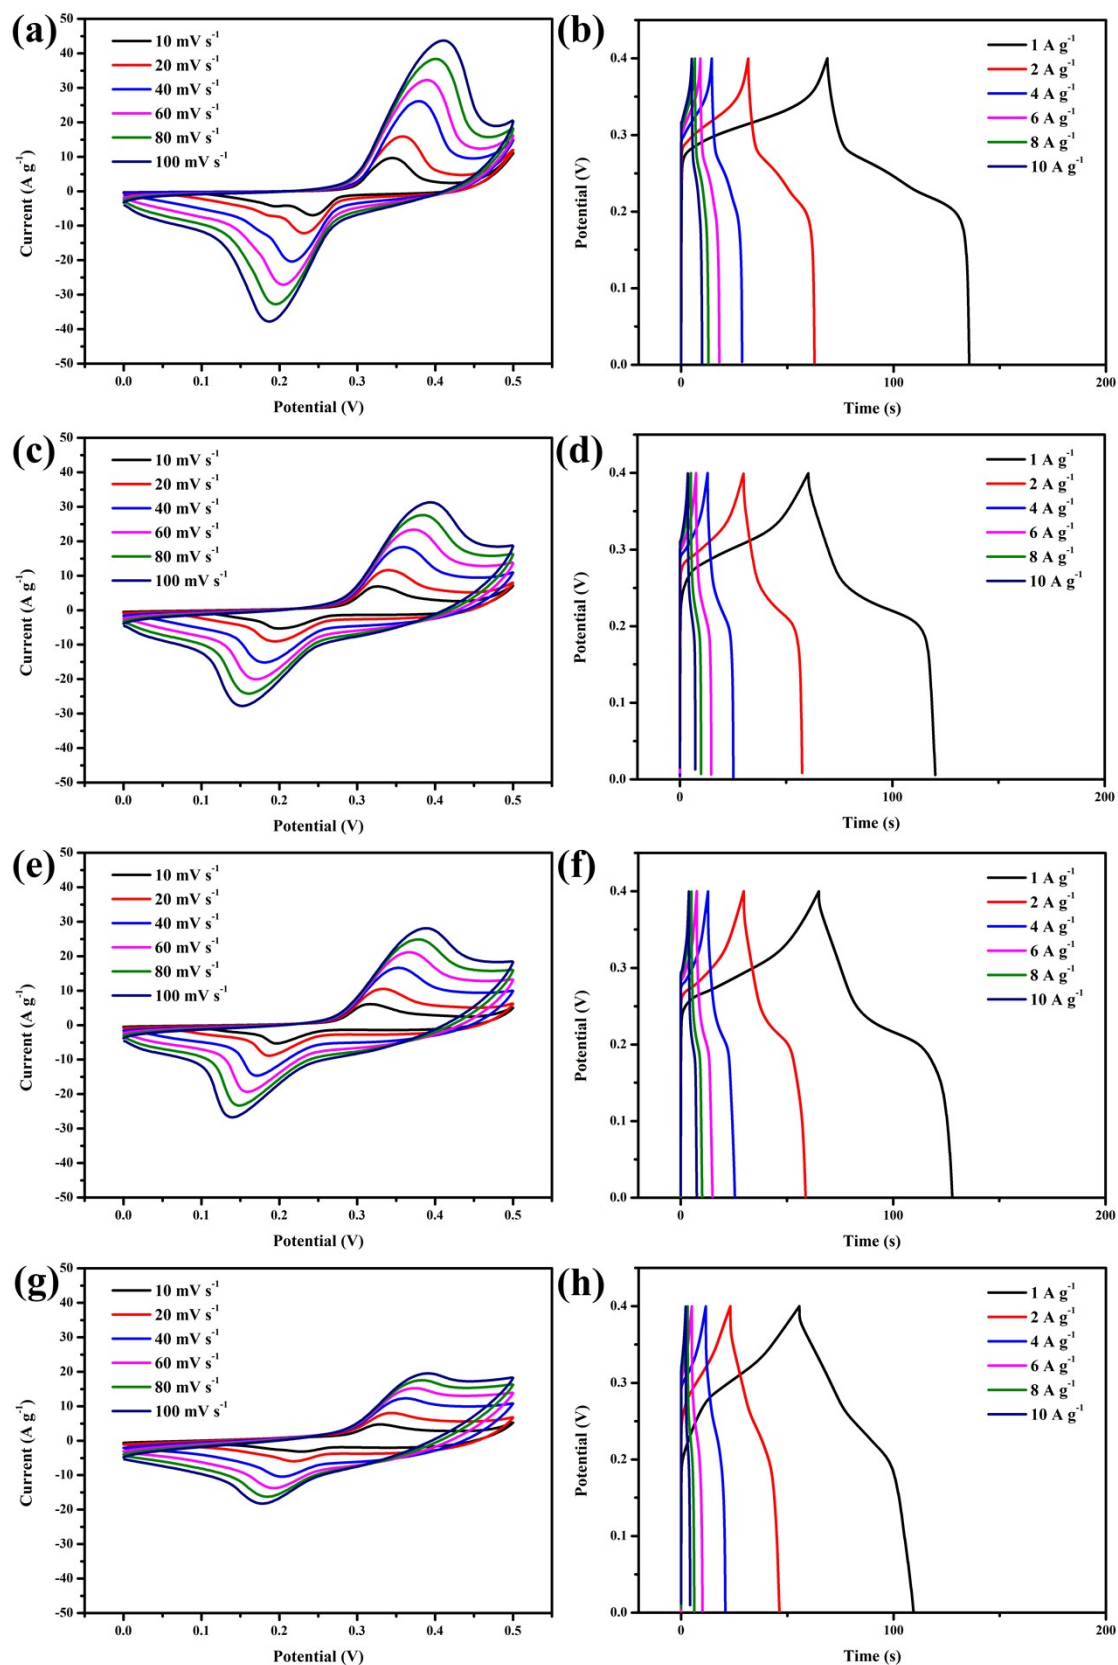

Figure S7. CV and GCD curves of (a, b) CMO-400, (c, d) CMO-500, (e, f) CMO-600, and (f, h) CMO-700.



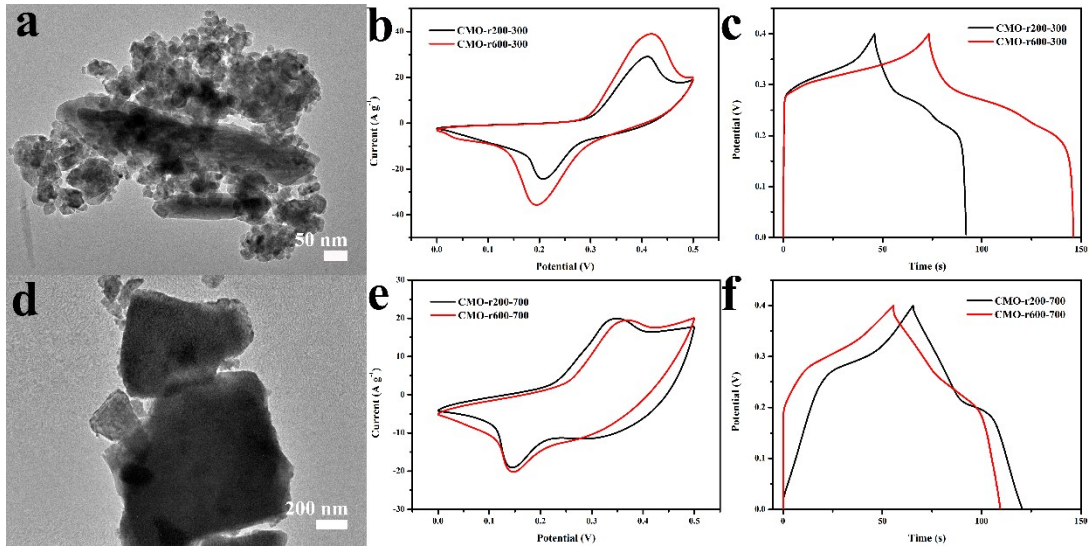

Figure S8. TEM images of (a) CMO-r200-300 and (d) CMO-r200-700; CV contrast pictures of (b) CMO-r200-300 vs CMO-r600-300 and (e) CMO-r200-700 vs CMO-r600-700; CD contrast pictures of (c) CMO-r200-300 vs CMO-r600-300 and (f) CMO-r200-700 vs CMO-r600-700.

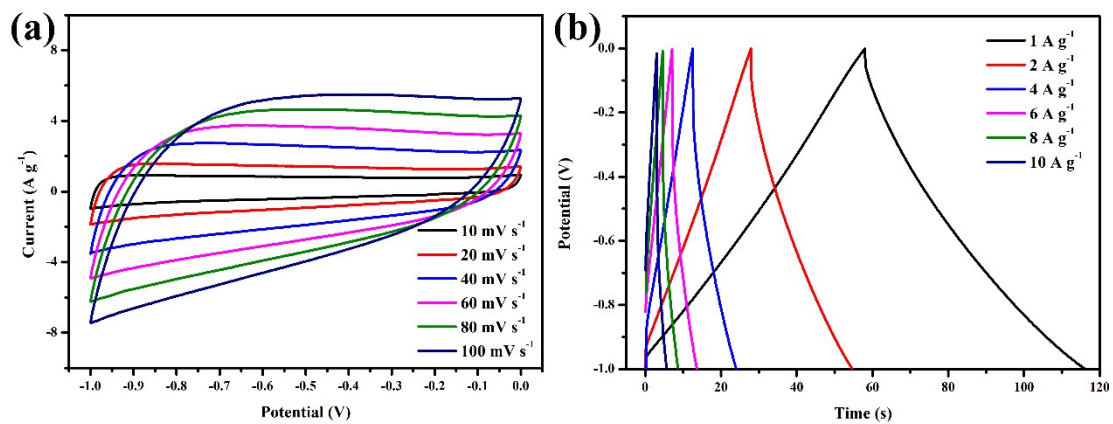

Figure S9. Electrochemical performance of the AC electrode: (a) CV curves at different scan rates; (b) GCD curves at various current densities.

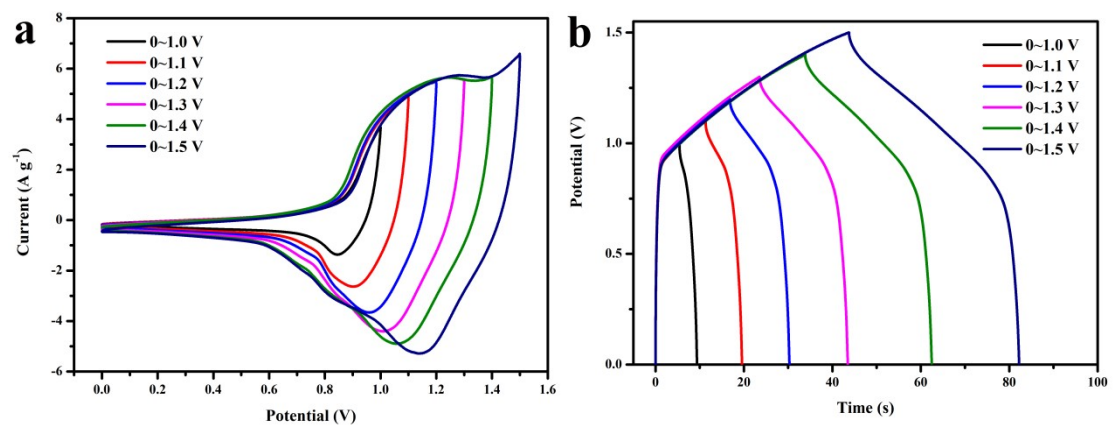

Figure S10. Electrochemical performance of the CMO-300//AC ASC device: (a) CV and (b) GCD curves at various potential windows.

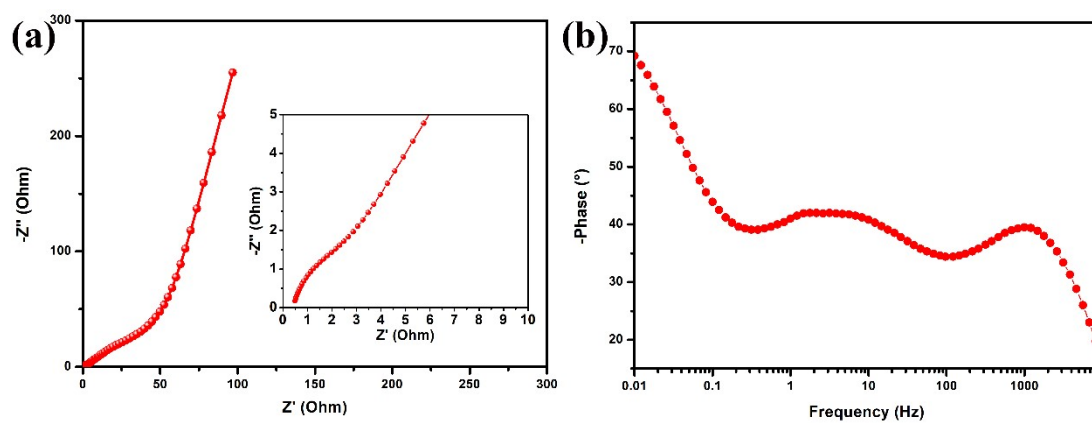

Figure S11. Electrochemical characterization of ASC device: (a) Nyquist plot, and (b) Bode phase angle plot.
